# Supplementary material
Source: PubMed Central journal article supplement (PMC3124015)
Supplement: mmc1.pdf [file mmc1.pdf]

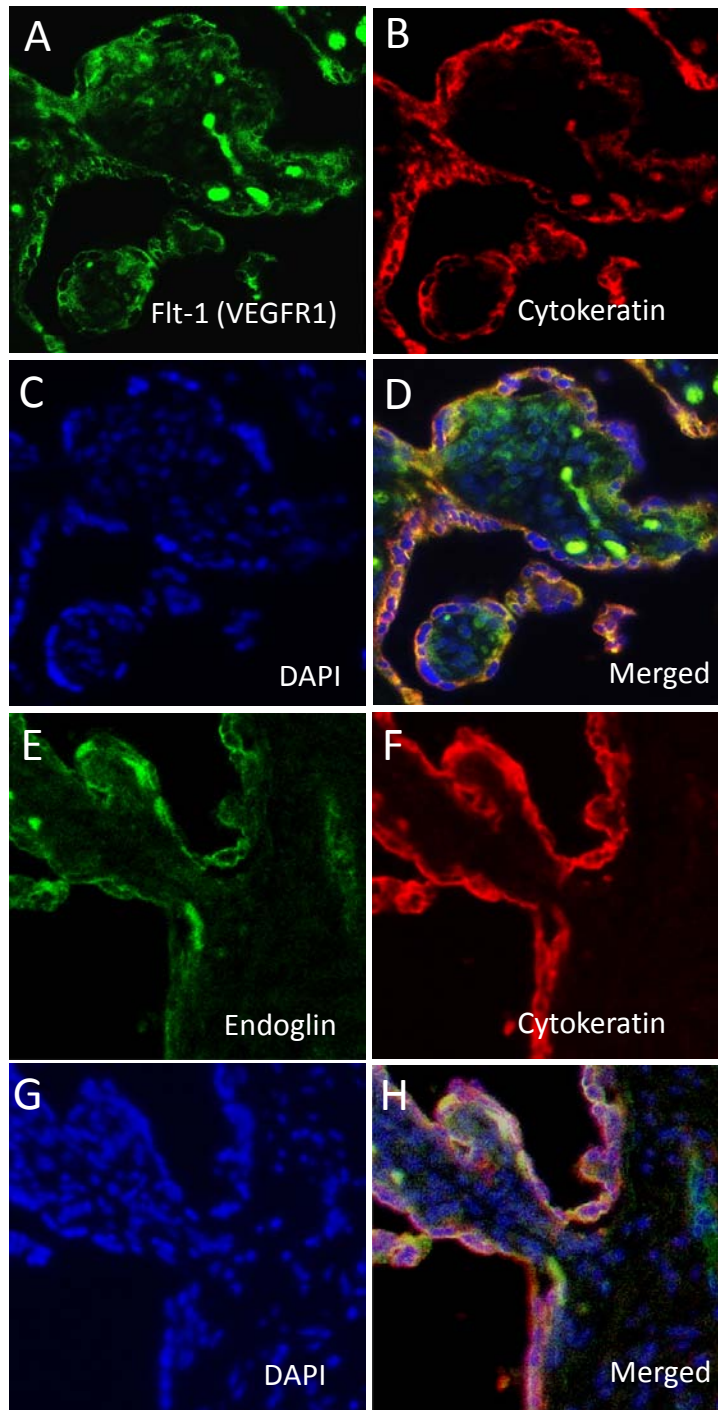

**Fig. S1. Immunolocalization of Flt-1 (VEGFR-1) and endoglin in term chorionic villi explants.** (A and E) Localization of Flt-1 (A, green) and Endoglin (E, Green) by immunofluorescence. (B and F) Immunolocalization of cyokeratin as a marker for trophoblast (red). (C and G) Nuclei are highlighted by DAPI fluorescence (blue). D and H represent the merged image of all three fluorescent labels; yellow fluorescence reveals areas where Flt-1 or endoglin co-localize with cyokeratin. The figures shown are representative of three independent experiments.
