# Supplementary material
Source: PubMed Central journal article supplement (PMC3124015)
Supplement: mmc2.pdf [file mmc2.pdf]

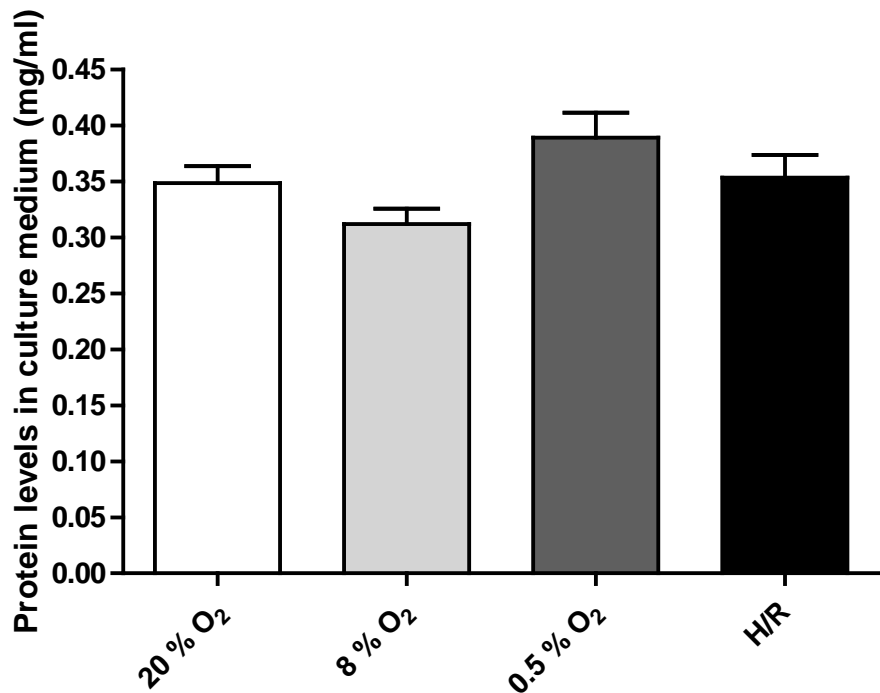

**Fig. 2S. Differences in total protein secreted in the medium of cultured chorionic villi explants.** For different O<sub>2</sub> concentrations (six explants per placenta with a minimum of three placentas per treatment), the total amount of proteins secreted in the medium was determined. No significant differences in the levels of released protein were observed between any of the groups. Error bars represent the standard error of the mean.
