# Supplementary material
Source: PubMed Central journal article supplement (PMC3124015)
Supplement: mmc3.pdf [file mmc3.pdf]

**A**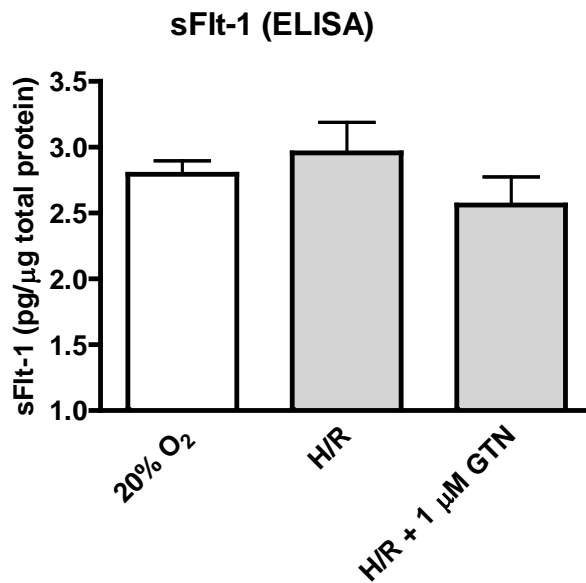**B**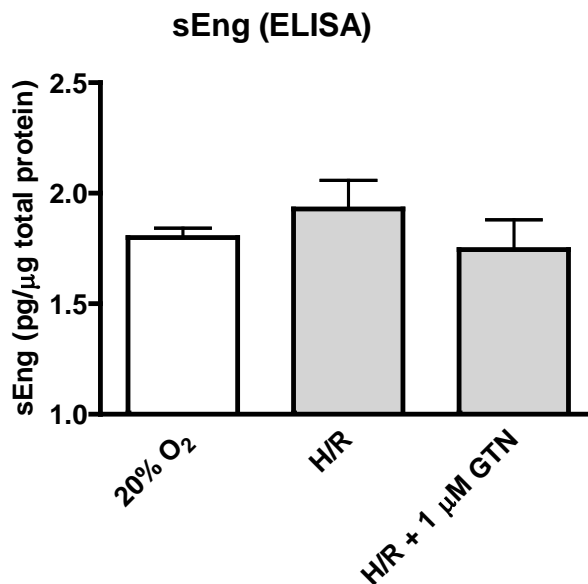

**Fig. 3S. Effect of GTN on the secretion of sFlt-1 and sEng by chorionic villi explants exposed to hypoxia/re-oxygenation (H/R). (A) & (B)** Relative sFlt-1 and sEng levels (respectively) in the media of explant cultures (6 explants per placenta with a minimum of three placentas per treatment). Values in pg/ml were divided by the total amount of protein ( $\mu\text{g/ml}$ ) in the media. No significant differences in the levels of sFlt-1 and sEng in the media were observed.
