# Supplementary material
Source: PubMed Central journal article supplement (PMC3124015)
Supplement: mmc4.pdf [file mmc4.pdf]

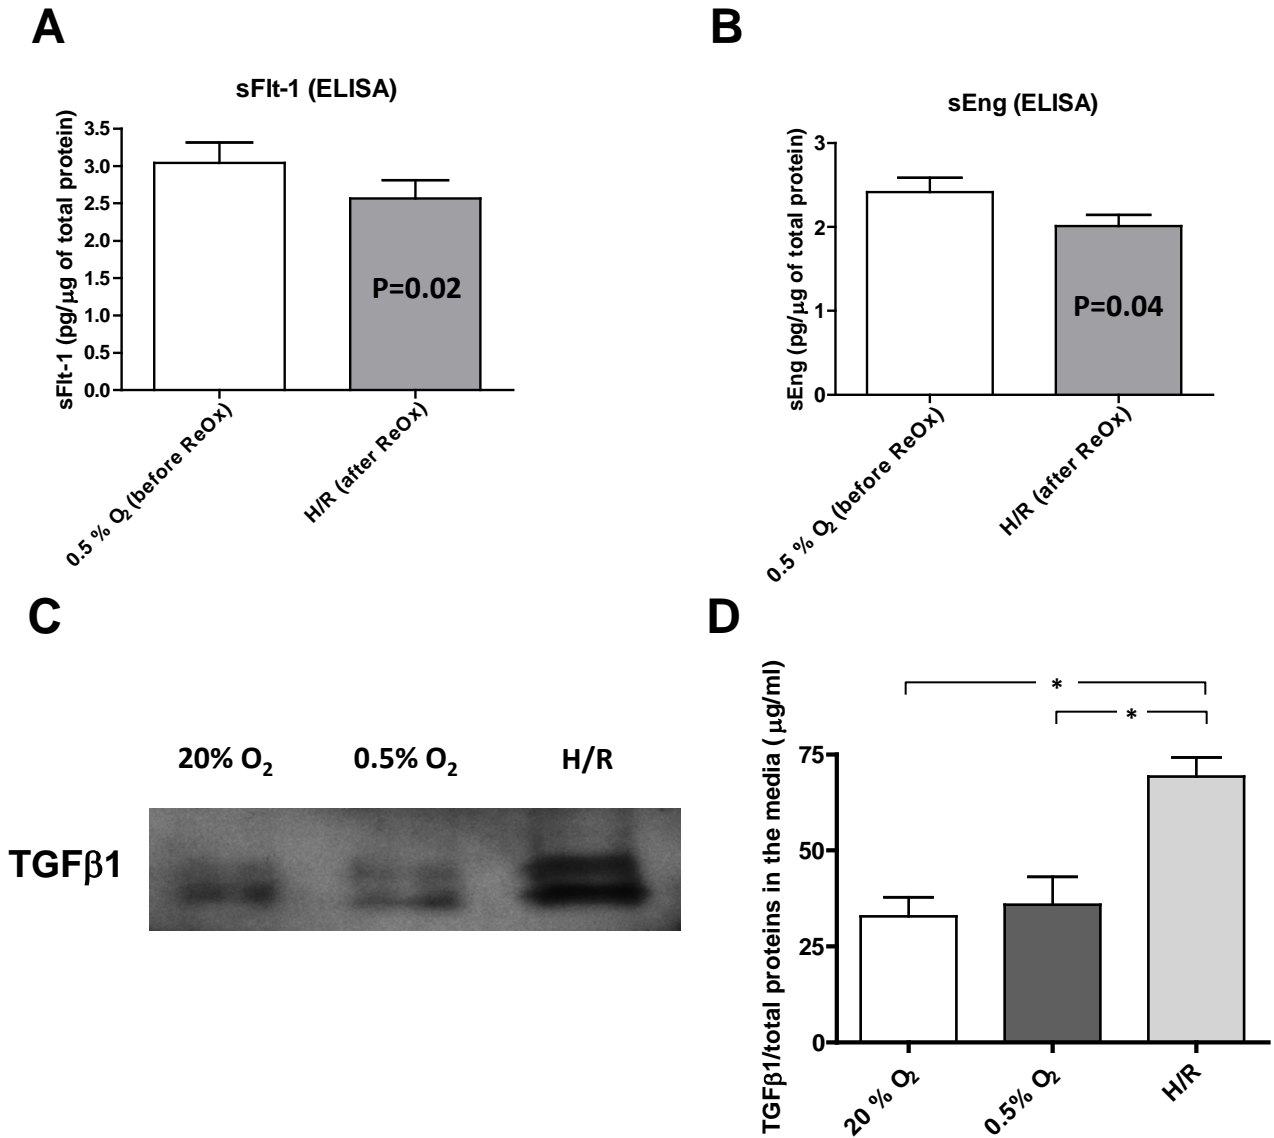

**Fig. 4S. Effect of re-oxygenation on chorionic villi explants previously exposed to hypoxia for 24 h.** (A & B) Levels of sFlt-1 and sEng in the culture media from hypoxia-exposed explants prior to and after re-exposure to 20% O<sub>2</sub> (H/R). Media from 6-7 explants per placenta from two placentas were used. Statistical significance was measured using paired Student's t-test. (C) Representative Western blot (of three different analyses) of TGFβ1 in the media of explants exposed to 20% O<sub>2</sub>, 0.5% O<sub>2</sub>, or 0.5% O<sub>2</sub> followed by re-oxygenation at 20% O<sub>2</sub> (H/R). (D) Densitometric analysis of Western blot shown in (C). Error bars represent standard error of the mean. Asterisk represents a P-value < 0.05.
